# Supplementary material
Source: publisher site journal article supplement (https://www.dovepress.com/article/382214)
Supplement: Supplementary file 1 [file get_supplementary_file.php]

# Appendix

**Appendix table 1** Characteristics of the study population, extrapolated

| prescribing period | 1-year periods | | | | |
| --- | --- | --- | --- | --- | --- |
| **2016** | **2017** | **2018** | **2019** | **2020** |
| persons | **number of persons [N, %]** | | | | |
| all | 8599529 | 8679579 | 8756089 | 8817805 | 8861529 |
| women | 4325164, 50.3 | 4364060, 50.3 | 4400988, 50.3 | 4432810, 50.3 | 4456600, 50.3 |
| men | 4274365, 49.7 | 4315518, 49.7 | 4355100, 49.7 | 4384995, 49.7 | 4404929, 49.7 |
| age | **number of persons [N, %]** | | | | |
| 0-19 years | 1729920, 20.1 | 1737815, 20.0 | 1752428, 20.0 | 1752194, 19.9 | 1759201, 19.9 |
| 20-39 years | 2310752, 26.9 | 2323872, 26.8 | 2338319, 26.7 | 2346644, 26.6 | 2333250, 26.3 |
| 40-59 years | 2501331, 29.1 | 2516210, 29.0 | 2527398, 28.9 | 2534532, 28.7 | 2543723, 28.7 |
| 60-79 years | 1593931, 18.5 | 1628944, 18.8 | 1656492, 18.9 | 169236, 19.2 | 1722834, 19.4 |
| 80-99 years | 461280, 5.4 | 470487, 5.4 | 479116, 5.5 | 489662, 5.6 | 499653, 5.6 |
| 100-119 years | 2315, <0.1 | 2250, <0.1 | 2335, <0.1 | 2411, <0.1 | 2869, <0.1 |
| persons with drug claims | **number of persons [N, %]** | | | | |
| any drug | 6381786, 74.2 | 6435329, 74.1 | 6516938, 74.4 | 6564928, 74.5 | 6448039, 72.8 |
| ≥1 PGx drug | 3578809, 41.6 | 3602571, 41.5 | 3646287, 41.6 | 3692229, 41.9 | 3466888, 39.1 |
| ≥2 PGx drugs | 1629564, 18.9 | 1647776, 19.0 | 1666827, 19.0 | 1693001, 19.2 | 1582608, 17.9 |
| ≥3 PGx drugs | 737068, 8.6 | 741902, 8.5 | 743995, 8.5 | 756118, 8.6 | 696532, 7.9 |
| ≥4 PGx drugs | 313186, 3.6 | 316222, 3.6 | 310332, 3.5 | 317640, 3.6 | 286573, 3.2 |
| ≥5 PGx drugs | 123416, 1.4 | 123138, 1.4 | 120499, 1.4 | 123545, 1.4 | 108402, 1.2 |
| ≥10 PGx drugs | 633, <0.1 | 637, <0.1 | 614, <0.1 | 650, <0.1 | 393, <0.1 |
|  | **mean per person ± sd** | | | | |
| drugs | 5.9±19.2 | 5.9±20.0 | 6.0±19.9 | 6.0±19.4 | 5.6±18.0 |
| PGx drugs | 0.8±3.1 | 0.8±3.2 | 0.8±3.2 | 0.8±3.1 | 0.7±2.9 |

**Abbreviations:** N: number of persons, %: percentage of all persons present in the respective observation period, sd: standard deviation, PGx: pharmacogenetic.

**Appendix table 2** PGx drugs stratified by prescribing periods 2016-2020

| drug | 1-year periods | | | | | | | | | | 5-year  period |
| --- | --- | --- | --- | --- | --- | --- | --- | --- | --- | --- | --- |
| **2016** | **2016 ef** | **2017** | **2017 ef** | **2018** | **2018 ef** | **2019** | **2019 ef** | **2020** | **2020 ef** | **2016-2020** |
| number of persons [N, %] | | | | | | | | | | | |
| ibuprofen | 206159, 17.6 | 1556975, 18.1 | 195631, 17.7 | 1580974, 18.2 | 210627, 18.5 | 1653877, 18.9 | 231131, 19.3 | 1722078, 19.5 | 220863,  16.8 | 1493422,  16.9 | 423442, 47.8 |
| pantoprazole | 160042, 13.7 | 1097715, 12.8 | 153933, 13.9 | 1111779, 12.8 | 159591, 14.0 | 1139668, 13 | 167148, 14 | 1158811,  13.1 | 173956, 13.2 | 1136911, 12.8 | 313206, 35.4 |
| tramadol | 50396,  4.3 | 362366,  4.2 | 46230,  4.2 | 352275,  4.1 | 45027,  4.0 | 338517,  3.9 | 45015,  3.8 | 328455,  3.7 | 44768,  3.4 | 303883,  3.4 | 129217, 14.6 |
| codeine | 34778,  3.0 | 250438,  2.9 | 31906,  2.9 | 243101,  2.8 | 32137,  2.8 | 240796,  2.8 | 36777,  3.1 | 265951,  3.0 | 29379,  2.2 | 198911,  2.2 | 100312, 11.3 |
| atorvastatin | 60349,  5.2 | 392525,  4.6 | 60752,  5.5 | 409647,  4.7 | 61474,  5.4 | 415064,  4.7 | 63140,  5.3 | 423256,  4.8 | 66423,  5.0 | 432706,  4.9 | 88948, 10.0 |
| omeprazole | 27361, 2.3 | 202475, 2.4 | 23862, 2.2 | 186200, 2.1 | 22337, 2.0 | 171597, 2.0 | 21675, 1.8 | 161817 ,1.8 | 21398, 1.6 | 148703, 1.7 | 50206, 5.7 |
| metoprolol | 38042, 3.3 | 251017, 2.9 | 36872, 3.3 | 252143, 2.9 | 36727, 3.2 | 250535, 2.9 | 36764, 3.1 | 249424 ,2.8 | 37456, 2.8 | 246456, 2.8 | 49893, 5.6 |
| escitalopram | 25322, 2.2 | 178200, 2.1 | 24589, 2.2 | 182701, 2.1 | 25579, 2.2 | 185665, 2.1 | 26654, 2.2 | 186480 ,2.1 | 27874, 2.1 | 182099, 2.1 | 46775, 5.3 |
| ondansetron | 12915, 1.1 | 94042, 1.1 | 13566, 1.2 | 105919, 1.2 | 14152, 1.2 | 109240, 1.2 | 16965, 1.4 | 124967 ,1.4 | 15358, 1.2 | 104133, 1.2 | 44673, 5.0 |
| tobramycin | 9131, 0.8 | 65457, 0.8 | 9170, 0.8 | 69628, 0.8 | 8939, 0.8 | 68064, 0.8 | 10009, 0.8 | 72339 ,0.8 | 8138, 0.6 | 53788, 0.6 | 29799, 3.4 |
| allopurinol | 18021, 1.5 | 117136, 1.4 | 17775, 1.6 | 119821, 1.4 | 18037, 1.6 | 121165, 1.4 | 18258, 1.5 | 121518 ,1.4 | 18806, 1.4 | 121492, 1.4 | 26433, 3.0 |
| simvastatin | 23139, 2.0 | 153448, 1.8 | 20853, 1.9 | 142399, 1.6 | 18869, 1.7 | 127923, 1.5 | 17250, 1.4 | 116923 ,1.3 | 16425, 1.2 | 108103, 1.2 | 25038, 2.8 |
| celecoxib | 8793, 0.8 | 60152, 0.7 | 8478, 0.8 | 60567, 0.7 | 8449, 0.7 | 60205, 0.7 | 8534, 0.7 | 59116 ,0.7 | 8627, 0.7 | 56402, 0.6 | 24480, 2.6 |
| clopidogrel | 12629, 1.1 | 78121, 0.9 | 12301, 1.1 | 78171, 0.9 | 12423, 1.1 | 79396, 0.9 | 12586, 1.1 | 80479 ,0.9 | 12563, 1.0 | 79105, 0.9 | 23359, 2.6 |
| trimipramine | 8381 ,0.7 | 56278, 0.7 | 7488, 0.7 | 52771, 0.6 | 7352, 0.6 | 51059, 0.6 | 7344, 0.6 | 49915 ,0.6 | 7660, 0.6 | 49896, 0.6 | 17121, 1.9 |
| sertraline | 8715, 0.7 | 62713, 0.7 | 8589, 0.8 | 65967, 0.8 | 8779, 0.8 | 65835, 0.8 | 9366, 0.8 | 67171 ,0.8 | 10284, 0.8 | 68319, 0.8 | 16187, 1.8 |
| venlafaxine | 10254 ,0.9 | 74122, 0.9 | 9852, 0.9 | 75433, 0.9 | 9864, 0.9 | 74518, 0.9 | 9940, 0.8 | 72373 ,0.8 | 10199, 0.8 | 68972, 0.8 | 15865, 1.8 |
| citalopram | 12175, 1.0 | 82894, 1.0 | 10964, 1.0 | 77978, 0.9 | 10157, 0.9 | 70760, 0.8 | 9412, 0.8 | 63475 ,0.7 | 8867, 0.7 | 57466, 0.6 | 15207, 1.7 |
| tacrolimus | 5334, 0.5 | 39496, 0.5 | 5262, 0.5 | 41390, 0.5 | 5528, 0.5 | 42574, 0.5 | 6021, 0.5 | 45081 ,0.5 | 6348, 0.5 | 43356, 0.5 | 15020, 1.7 |
| phenprocoumon | 15258, 1.3 | 86989, 1.0 | 13217, 1.2 | 77652, 0.9 | 11463, 1.0 | 67816, 0.8 | 9919, 0.8 | 58923 ,0.7 | 8593, 0.7 | 50749, 0.6 | 13988, 1.6 |
| risperidone | 5224, 0.4 | 34784, 0.4 | 5245, 0.5 | 36672, 0.4 | 5519, 0.5 | 37865, 0.4 | 5724, 0.5 | 37784 ,0.4 | 6081, 0.5 | 37743, 0.4 | 9357, 1.1 |
| lornoxicam | 4303, 0.4 | 29065, 0.3 | 3559, 0.3 | 25131, 0.3 | 3363, 0.3 | 24004, 0.3 | 3064, 0.3 | 21305 ,0.2 | 881, 0.1 | 5665, 0.1 | 9264, 1.0 |
| dexlansoprazole | 2829, 0.2 | 17426, 0.2 | 3020, 0.3 | 19264, 0.2 | 3420, 0.3 | 22268, 0.3 | 4138, 0.3 | 26212 ,0.3 | 3545, 0.3 | 21247, 0.2 | 9159, 1.0 |
| amitriptyline | 4264, 0.4 | 29797, 0.3 | 4004, 0.4 | 29252, 0.3 | 4013, 0.4 | 29131, 0.3 | 4153, 0.3 | 29566 ,0.3 | 3937, 0.3 | 26205, 0.3 | 8961, 1.0 |
| suxamethonium | 2372, 0.2 | 20975, 0.2 | 2573, 0.2 | 24145, 0.3 | 2804, 0.2 | 25843, 0.3 | 2390, 0.2 | 20208 ,0.2 | 2018, 0.2 | 14671, 0.2 | 8285, 0.9 |
| sevoflurane | 2025, 0.2 | 15731, 0.2 | 1915, 0.2 | 16509, 0.2 | 2046, 0.2 | 17186, 0.2 | 2406, 0.2 | 19612 ,0.2 | 2606, 0.2 | 18613, 0.2 | 7576, 0.9 |
| lansoprazole | 4785, 0.4 | 34010, 0.4 | 4134, 0.4 | 30641, 0.4 | 3811, 0.3 | 27861, 0.3 | 3677 ,0.3 | 26240 ,0.3 | 3853, 0.3 | 26029 ,0.3 | 7502, 0.8 |
| fluorouracil | 2024, 0.2 | 13182, 0.2 | 1883, 0.2 | 12593, 0.1 | 2017, 0.2 | 13478, 0.2 | 2137, 0.2 | 14295 ,0.2 | 2773, 0.2 | 17769, 0.2 | 6878, 0.8 |
| haloperidol | 3256, 0.3 | 19896, 0.2 | 3275, 0.3 | 20282, 0.2 | 3430, 0.3 | 20896, 0.2 | 3797, 0.3 | 22091 ,0.3 | 4016, 0.3 | 22914, 0.3 | 6738, 0.8 |
| paroxetine | 4343, 0.4 | 31191, 0.4 | 4047, 0.4 | 30612, 0.4 | 4009, 0.4 | 29994, 0.3 | 4118, 0.3 | 29364 ,0.3 | 4256, 0.3 | 28024, 0.3 | 6387, 0.7 |
| piroxicam | 2453, 0.2 | 17388, 0.2 | 2039, 0.2 | 15358, 0.2 | 1790, 0.2 | 13210, 0.2 | 1474, 0.1 | 10516 ,0.1 | 1507, 0.1 | 10101, 0.1 | 5600, 0.6 |
| aripiprazole | 2340, 0.2 | 18107, 0.2 | 2540, 0.2 | 20809, 0.2 | 2760, 0.2 | 22086, 0.3 | 2866, 0.2 | 21617 ,0.2 | 3197, 0.2 | 21887, 0.2 | 4906, 0.6 |
| acenocoumarol | 4873, 0.4 | 35104, 0.4 | 4123, 0.4 | 30362, 0.3 | 3661, 0.3 | 26726, 0.3 | 3216, 0.3 | 23286 ,0.3 | 2795, 0.2 | 19822, 0.2 | 4378, 0.5 |
| carbamazepine | 2356, 0.2 | 16912, 0.2 | 2192, 0.2 | 16637, 0.2 | 2096, 0.2 | 15610, 0.2 | 2076, 0.2 | 14959 ,0.2 | 2037, 0.2 | 13825, 0.2 | 3133, 0.4 |
| tamoxifen | 1592, 0.1 | 10681, 0.1 | 1535, 0.1 | 10642, 0.1 | 1499, 0.1 | 10319, 0.1 | 1533, 0.1 | 10393 ,0.1 | 1645, 0.1 | 10683, 0.1 | 2746, 0.3 |
| azathioprine | 1700, 0.1 | 12348, 0.1 | 1618, 0.1 | 12623, 0.1 | 1627, 0.1 | 12537, 0.1 | 1589, 0.1 | 11732 ,0.1 | 1518, 0.1 | 10442, 0.1 | 2425, 0.3 |
| flecainide | 927, 0.1 | 6431, 0.1 | 908, 0.1 | 6486, 0.1 | 955, 0.1 | 6787, 0.1 | 974, 0.1 | 6939 ,0.1 | 1037, 0.1 | 7005, 0.1 | 1761, 0.2 |
| clomipramine | 908, 0.1 | 6165, 0.1 | 837, 0.1 | 5894, 0.1 | 801, 0.1 | 5615, 0.1 | 773, 0.1 | 5218 ,0.1 | 714, 0.1 | 4583, 0.1 | 1405, 0.2 |
| capecitabine | 497, <0.1 | 3113, <0.1 | 468, <0.1 | 3181, <0.1 | 467, <0.1 | 3152, <0.1 | 454, <0.1 | 3051 ,<0.1 | 465, <0.1 | 3029, <0.1 | 1127, 0.1 |
| doxorubicin | 394, <0.1 | 2616, <0.1 | 358, <0.1 | 2553, <0.1 | 352, <0.1 | 2512, <0.1 | 362, <0.1 | 2451 ,<0.1 | 427, <0.1 | 2769, <0.1 | 1093, 0.1 |
| desflurane | 242, <0.1 | 2080, 0.0 | 252, <0.1 | 2445, <0.1 | 278, <0.1 | 2613, <0.1 | 310, 0.0 | 2574 ,<0.1 | 312, <0.1 | 2046, <0.1 | 1046, 0.1 |
| flucloxacillin | 270, 0.0 | 1962, <0.1 | 276, <0.1 | 2228, <0.1 | 274, <0.1 | 2212, <0.1 | 304, <0.1 | 2379 ,<0.1 | 338, <0.1 | 2310, 0.0 | 999, 0.1 |
| oxcarbazepine | 518, <0.1 | 3821, <0.1 | 512, <0.1 | 4037, <0.1 | 534, <0.1 | 4055, <0.1 | 533, <0.1 | 3815 ,<0.1 | 573, <0.1 | 3796, <0.1 | 914, 0.1 |
| abacavir | 756, 0.1 | 6012, 0.1 | 735, 0.1 | 6286, 0.1 | 690, 0.1 | 5821, 0.1 | 631, 0.1 | 5051 ,0.1 | 532, <0.1 | 3834, <0.1 | 866, 0.1 |
| doxepin | 368, <0.1 | 2496, <0.1 | 364, <0.1 | 2630, 0.0 | 337, <0.1 | 2456, <0.1 | 346, <0.1 | 2441 ,<0.1 | 196, <0.1 | 1284 ,<0.1 | 755, 0.1 |
| fluvoxamine | 443, <0.1 | 3328, <0.1 | 421, <0.1 | 3331, <0.1 | 435, <0.1 | 3324, <0.1 | 441, <0.1 | 3257 ,<0.1 | 482, <0.1 | 3123, <0.1 | 747, 0.1 |
| atomoxetine | 314, <0.1 | 2451, <0.1 | 294, <0.1 | 2563, <0.1 | 288, <0.1 | 2405, <0.1 | 341, <0.1 | 2613 ,<0.1 | 381, <0.1 | 2545, <0.1 | 736, 0.1 |
| zuclopenthixol | 439, <0.1 | 3175, <0.1 | 396, <0.1 | 3081, <0.1 | 394, <0.1 | 2955, <0.1 | 410, 0.0 | 2849 ,<0.1 | 403, <0.1 | 2624, <0.1 | 661, 0.1 |
| cisplatin | 198, <0.1 | 1409, <0.1 | 167, <0.1 | 1242, <0.1 | 165, <0.1 | 1198, <0.1 | 173, <0.1 | 1250 ,0.0 | 229, <0.1 | 1579, <0.1 | 500, 0.1 |
| phenytoin | 490, 0.0 | 3319, <0.1 | 441, <0.1 | 3105, <0.1 | 422, <0.1 | 2945, <0.1 | 387, <0.1 | 2698 ,<0.1 | 368, <0.1 | 2448, <0.1 | 446, 0.1 |
| tenoxicam | 173, <0.1 | 1222, <0.1 | 135, <0.1 | 1002, <0.1 | 124, <0.1 | 898, <0.1 | 111, <0.1 | 797, <0.1 | 113, <0.1 | 816, <0.1 | 383, <0.1 |
| efavirenz | 406, <0.1 | 3421, <0.1 | 325, <0.1 | 2873, <0.1 | 245, <0.1 | 2037, <0.1 | 172, <0.1 | 1359 ,<0.1 | 130, 0.0 | 944, <0.1 | 382, <0.1 |
| meloxicam | 437, <0.1 | 3114, <0.1 | 11, <0.1 | 73, <0.1 | 0, 0.0 | 0, 0.0 | 0, 0.0 | 0, 0.0 | 0, 0.0 | 0, 0.0 | 370, <0.1 |
| propafenone | 195, <0.1 | 1250, 0.0 | 182, <0.1 | 1185, <0.1 | 167, <0.1 | 1093, <0.1 | 182, <0.1 | 1213, <0.1 | 165, <0.1 | 1062, <0.1 | 324, <0.1 |
| brexpiprazole | 0, 0.0 | 0, 0.0 | 0, 0.0 | 0, 0.0 | 0, 0.0 | 0, 0.0 | 160, 0.0 | 1393, <0.1 | 318, <0.1 | 2381, <0.1 | 323, <0.1 |
| flurbiprofen | 205, <0.1 | 1415, <0.1 | 209, <0.1 | 1569, <0.1 | 57, <0.1 | 442, <0.1 | 2, <0.1 | 11, <0.1 | 1, <0.1 | 4, <0.1 | 299, <0.1 |
| hydrocodone | 61, <0.1 | 471, <0.1 | 71, <0.1 | 572, <0.1 | 75, <0.1 | 572, <0.1 | 68, <0.1 | 509, <0.1 | 93, <0.1 | 630, 0.0 | 277, <0.1 |
| isoflurane | 92, <0.1 | 934, <0.1 | 73, <0.1 | 903, <0.1 | 74, <0.1 | 920, 0.0 | 92, <0.1 | 1090, 0.0 | 86, <0.1 | 915, <0.1 | 270, <0.1 |
| mercaptopurine | 145, <0.1 | 1035, <0.1 | 127, <0.1 | 975, <0.1 | 129, <0.1 | 970, 0.0 | 107, <0.1 | 756, <0.1 | 100, 0.0 | 667, <0.1 | 206, <0.1 |
| ribavirin | 119, <0.1 | 859, <0.1 | 80, 0.0 | 703, <0.1 | 26, <0.1 | 248, <0.1 | 15, <0.1 | 111, <0.1 | 11, <0.1 | 89, <0.1 | 183, <0.1 |
| atazanavir | 185, <0.1 | 1383, <0.1 | 123, <0.1 | 993, <0.1 | 91, <0.1 | 708, <0.1 | 70, 0.0 | 512, <0.1 | 48, <0.1 | 311, <0.1 | 170, <0.1 |
| voriconazole | 61, <0.1 | 426, <0.1 | 55, <0.1 | 411, <0.1 | 54, <0.1 | 398, <0.1 | 53, <0.1 | 356, <0.1 | 51, <0.1 | 359, <0.1 | 129, <0.1 |
| gentamicin | 82, <0.1 | 442, <0.1 | 22, <0.1 | 127, <0.1 | 9, <0.1 | 69, <0.1 | 11, <0.1 | 61, <0.1 | 10, 0.0 | 64, <0.1 | 119, <0.1 |
| amikacin | 35, <0.1 | 416, <0.1 | 30, 0.0 | 340, 0.0 | 30, 0.0 | 344, <0.1 | 20, 0.0 | 252, <0.1 | 22, <0.1 | 207, <0.1 | 93, <0.1 |
| peginterferon alfa-2a | 42, <0.1 | 330, 0.0 | 36, <0.1 | 310, 0.0 | 43, <0.1 | 329, <0.1 | 49, <0.1 | 373, <0.1 | 60, 0.0 | 411, <0.1 | 88, <0.1 |
| nortriptyline | 98, <0.1 | 672, <0.1 | 6, <0.1 | 37, <0.1 | 0, 0.0 | 0, 0.0 | 0, 0.0 | 0, 0.0 | 0, 0.0 | 0, 0.0 | 75, <0.1 |
| thioguanine | 7, <0.1 | 56, <0.1 | 11, <0.1 | 82, <0.1 | 9, <0.1 | 85, <0.1 | 7, <0.1 | 48, <0.1 | 4, <0.1 | 27, <0.1 | 26, <0.1 |
| ivacaftor | 0, 0.0 | 0, 0.0 | 0, 0.0 | 0, 0.0 | 0, 0.0 | 0, 0.0 | 1, <0.1 | 6, <0.1 | 18, <0.1 | 148, <0.1 | 16, <0.1 |
| rasburicase | 1, <0.1 | 3, <0.1 | 4, <0.1 | 26, <0.1 | 4, <0.1 | 26, <0.1 | 8, <0.1 | 55, <0.1 | 5, <0.1 | 27, <0.1 | 6, <0.1 |
| peginterferon alfa-2b | 5, <0.1 | 39, <0.1 | 4, <0.1 | 33, <0.1 | 2, <0.1 | 22, <0.1 | 1, <0.1 | 13, <0.1 | 0, 0.0 | 0, 0.0 | 6, <0.1 |
| tropisetron | 3, <0.1 | 16, <0.1 | 0, 0.0 | 0, 0.0 | 0, 0.0 | 0, 0.0 | 1, <0.1 | 7, <0.1 | 1, <0.1 | 5 , <0.1 | 3, <0.1 |
| paromomycin | 0, 0.0 | 0, 0.0 | 0, 0.0 | 0, 0.0 | 0, 0.0 | 0, 0.0 | 1, <0.1 | 6, <0.1 | 3, <0.1 | 19, <0.1 | 2, <0.1 |
| imipramine | 1, <0.1 | 7, <0.1 | 1, <0.1 | 11, <0.1 | 0, 0.0 | 0, 0.0 | 0, 0.0 | 0, 0.0 | 0, 0.0 | 0, 0.0 | 1, <0.1 |

**Notes:** The drugs are ranked by the number of exposed persons in the 5-year period 2016-2020.

Following drugs are not listed, because there were 0 hits: daunorubicin, eliglustat, flucytosine, irinotecan, methoxyflurane, siponimod.
Not approved in Switzerland: desipramine, enflurane, fluindione, fosphenytoin, halothane, kanamycin, pimozide, plazomicin, streptomycin, tegafur, warfarin.

**Abbreviations:** ef: extrapolation factor, N: number of persons, %: percentage of all persons present in the respective observation period , PGx: pharmacogenetic**.**

**Appendix table 3** Genes associated with PGx drugs, extrapolated

| gene | 1-year periods | | | | |
| --- | --- | --- | --- | --- | --- |
| **2016** | **2017** | **2018** | **2019** | **2020** |
| number of persons [N, %] | | | | | |
| *CYP2C9* | 1672307, 46.7 | 1685642, 46.8 | 1750588, 48.0 | 1809006, 49.0 | 1566347, 45.2 |
| *CYP2C19* | 1580403, 44.2 | 1580343, 43.9 | 1594181, 43.7 | 1600632, 43.4 | 1555805, 44.9 |
| *CYP2D6* | 1015156, 28.4 | 1017267, 28.2 | 1007478, 27.6 | 1032353, 28.0 | 930695, 26.8 |
| *SLCO1B1* | 537836, 15.0 | 539861, 15.0 | 529730, 14.5 | 526103, 14.2 | 525802, 15.2 |
| *HLA-B* | 144851, 4.0 | 147940, 4.1 | 148069, 4.1 | 147145, 4.0 | 144707, 4.2 |
| *MT-RNR1* | 65992, 1.8 | 69901, 1.9 | 68355, 1.9 | 72548, 2.0 | 54041, 1.6 |
| *VKORC1* | 121823, 3.4 | 107755, 3.0 | 94372, 2.6 | 81975, 2.2 | 70406, 2.0 |
| *CYP3A4* | 39417, 1.1 | 41345, 1.1 | 42534, 1.2 | 45021, 1.2 | 43304, 1.2 |
| *CYP3A5* | 39417, 1.1 | 41345, 1.1 | 42534, 1.2 | 45021, 1.2 | 43304, 1.2 |
| *CACNA1S* | 33574, 0.9 | 37277, 1.0 | 39519, 1.1 | 36469, 1.0 | 31264, 0.9 |
| *RYR1* | 31930, 0.9 | 35552, 1.0 | 37743, 1.0 | 34740, 0.9 | 29685, 0.9 |
| *DPYD* | 15828, 0.4 | 15387, 0.4 | 16257, 0.4 | 16966, 0.5 | 20397, 0.6 |
| *HLA-A* | 16912, 0.5 | 16637, 0.5 | 15610, 0.4 | 14959, 0.4 | 13825, 0.4 |
| *TPMT* | 14729, 0.4 | 14744, 0.4 | 14655, 0.4 | 13712, 0.4 | 12643, 0.4 |
| *NUDT15* | 13320, 0.4 | 13502, 0.4 | 13466, 0.4 | 12462, 0.3 | 11069, 0.3 |
| *RARG* | 2616, 0.1 | 2553, 0.1 | 2512, 0.1 | 2451, 0.1 | 2769, 0.1 |
| *SLC8A3* | 2616, 0.1 | 2553, 0.1 | 2512, 0.1 | 2451, 0.1 | 2769, 0.1 |
| *UGT1A6* | 2616, 0.1 | 2553, 0.1 | 2512, 0.1 | 2451, 0.1 | 2769, 0.1 |
| *CYP2B6* | 3367, 0.1 | 2844, 0.1 | 2021, 0.1 | 1359, <0.1 | 937, <0.1 |
| *IFNL3* | 1186, <0.1 | 1046, <0.1 | 599, <0.1 | 497, <0.1 | 500, <0.1 |
| *UGT1A1* | 1383, <0.1 | 993, <0.1 | 708, <0.1 | 512, <0.1 | 311, <0.1 |
| *CFTR* | 0, 0.0 | 0, 0.0 | 0, 0.0 | 6, <0.1 | 148, <0.1 |
| *G6PD* | 3, <0.1 | 26, <0.1 | 26, <0.1 | 55, <0.1 | 27, <0.1 |
| *CYP4F2* | 0, 0.0 | 0, 0.0 | 0, 0.0 | 0, 0.0 | 0, 0.0 |

**Notes:** The genes are ranked by the highest number of persons with claims for associated drugs in the 5-year period 2016-2020.

**Abbreviations:** N: number of persons, %: percentage of all persons with PGx drug claims in the respective observation period, PGx: pharmacogenetic.
